# Supplementary material
Source: MDPI journal article supplement (https://www.mdpi.com/2073-445X/11/10/1615)
Supplement: s1 [file s1]

## METADATA FOR BAKER DATASETS

### **SanJuanMtsFirePerims**

This dataset contains fire perimeters for all fires 1980-2020 within the San Juan Mountain Boundary. This is in the NAD83 UTM Zone13 projection.

YEAR = Year of the fire

NAME = Name of the fire

IDGEO = Geographic identifier, based on source datasets. This is incomplete, because not all sources provided this ID.

IDUNI = Unit identifier for the fire. This, too, is incomplete, because not all sources provided this ID.

SOURCEID = Agency source for the data: BLM = Bureau of Land Management, USFS = US Forest Service, WFDSS = USGS Wildland Fire Decision Support System

METHOD = Method used to create the fire-perimeter map. These include the use of GPS (geographical positioning systems), hand sketching (from an airplane?), drawing from infrared imagery or Landsat.

MISC = miscellaneous comments on the perimeter map and the fire itself, including why a particular source was chosen over others. I did not find a source that decodes all the abbreviations in this column.

DATASET = See Table 2 in text for digital link to these dataset sources.

AreaAcres = Area of fire in acres from Calculate Geometry in ArcGIS 10.8.1

AreaHa = Area of fire in hectares from Calculate Geometry in ArcGIS 10.8.1

CAUSE = Derived from the Statistical Cause reporting field in USFS records. See Table 3 in the main text for my modifications of this field.

Shape\_Length and Shape\_Area = these are automatically created fields in a geodatabase

### **SanJuanMtsFirePoints**

This dataset contains fire points for all fires 1980-2020 within the San Juan Mountain Boundary. This is in the NAD83 UTM Zone13 projection

YEARNAME = This is a text version of the fire year combined with the fire name

YEAR = Year of the fire

NAME = Name of the fire

DATASET = See Table 2 in text for digital link to these dataset sources.

OWNER = Landowner where the fire occurred. Where this is known, these are the codes: BIA = Bureau of Indian Affairs, BLM = Bureau of Land Management, BOR = Bureau of Reclamation, FS, USFS = US Forest Service, FWS = US Fish & Wildlife Service, NPS = US National Park Service, Private = Private, State = State of Colorado

CAUSE = Derived from the Statistical Cause reporting field in USFS records. See Table 3 in the main text for my modifications of this field.

AreaAcres = Area of fire in acres from Calculate Geometry in ArcGIS 10.8.1

AreaHa = Area of fire in hectares from Calculate Geometry in ArcGIS 10.8.1
